# Mental health, blood pressure and the development of hypertension

H. Lina Schaare<sup>1,7,8,11</sup>, Maria Blöchl<sup>1,2</sup>, Deniz Kumral<sup>1,9,10</sup>, Marie Uhlig<sup>1</sup>, Lorenz Lemcke<sup>4</sup>, Sofie L. Valk<sup>7,8,11</sup>, Arno Villringer<sup>1,3,5,6</sup>

## Affiliations

- 1 Department of Neurology, Max Planck Institute for Human Cognitive and Brain Sciences, Leipzig, Germany
- 2 Institute for Psychology, Leipzig University, Leipzig, Germany
- 3 MindBrainBody Institute, Berlin School of Mind and Brain, Berlin, Germany
- 4 Nuclear Magnetic Resonance Unit, Max Planck Institute for Human Cognitive and Brain Sciences, Leipzig, Germany
- 5 Clinic of Cognitive Neurology, Leipzig University, Leipzig, Germany
- 6 Charité University Medicine Berlin, Berlin, Germany
- 7 Otto-Hahn-Group Cognitive Neurogenetics, Max Planck Institute for Human Cognitive and Brain Sciences, Leipzig, Germany
- 8 Institute of Neuroscience and Medicine (INM-7: Brain and Behaviour), Research Centre Jülich, Germany
- 9 Institute of Psychology, Neuropsychology, University of Freiburg, Freiburg, Germany
- 10 Institute of Psychology, Clinical Psychology and Psychotherapy Unit, University of Freiburg, Freiburg, Germany
- 11 Institute of Systems Neuroscience, Medical Faculty, Heinrich Heine University Düsseldorf, Düsseldorf, Germany

Corresponding author: Dr. H. Lina Schaare

Max Planck Institute for Human Cognitive and Brain Sciences

Stephanstr. 1A, 04103 Leipzig, Germany

+4934199402220

schaare@cbs.mpg.de

## 30 Abstract

31 Hypertension (HTN) has been associated with a greater risk of affective disorders.  
32 Paradoxically, several studies have shown the opposite effect in which high blood pressure relates to  
33 less depressive symptoms and greater well-being. Here we dissolve this paradox and clarify the  
34 relationship between mental health, blood pressure and the development of HTN using the UK Biobank.  
35 In adjusted multiple linear regression models, we found that the presence of a HTN diagnosis was  
36 associated with impaired mental health (i.e. more depressive symptoms (N = 303,771;  $\beta = 0.043$ ; 95%  
37 CI [0.039, 0.047];  $p < 0.001$ ) and lower well-being scores (N = 129,876;  $\beta = -0.057$ ; 95% CI [-0.064, -  
38 0.050];  $p < 0.001$ )) at baseline, whereas higher systolic blood pressure (SBP) was associated with fewer  
39 depressive symptoms (N = 303,771;  $\beta = -0.063$ ; 95% CI [-0.067, -0.060];  $p < 0.001$ ) and higher well-  
40 being scores (N = 129,876;  $\beta = 0.057$ ; 95% CI [0.051, 0.063];  $p < 0.001$ ). These effects persisted until  
41 follow-up (~10 years later). To explore a potential link between the mental health-blood pressure  
42 association and the development of HTN, we compared participants who were normotensive at baseline  
43 and developed HTN until follow-up with those who stayed normotensive. Notably, the adjusted model  
44 showed impaired mental health already at baseline in HTN developers (i.e., before HTN diagnosis;  
45 depressive symptoms:  $\beta = 0.060$ ; 95% CI [0.045, 0.076];  $p < 0.001$ ; well-being:  $\beta = -0.043$ ; 95% CI [-  
46 0.068, -0.017];  $p < 0.001$ ), indicating that people who develop HTN might require higher blood pressure  
47 levels for the same mental health outcomes as normotensives. In addition, the negative association  
48 between SBP and depressive symptoms at baseline was moderated by HTN development ( $\beta = -0.014$ ;  
49 95% CI [-0.026, -0.003];  $p = 0.015$ ), suggesting that the negative relationship between mental health and  
50 blood pressure was accentuated in people developing HTN several years before receiving their HTN  
51 diagnosis. We further observed that higher SBP was associated with lower emotion-related brain  
52 activity from functional magnetic resonance imaging (fMRI;  $\beta = -0.032$  95% CI [-0.045, -0.019];  
53  $p < 0.001$ ). This effect was also moderated by HTN diagnosis, suggesting an impact of SBP and HTN  
54 on the central nervous processing of emotions. Possible mechanisms are discussed, including regulatory  
55 baroreceptor circuits linking arterial blood pressure to neural processing of emotions. Overall, our  
56 results show an interrelation between mental health and blood pressure that may be involved in the  
57 development of HTN. In people who develop HTN, this relationship seems to be altered, such that  
58 higher blood pressure is required to sustain mental health, potentially offering a novel perspective for  
59 developing preventive and therapeutic measures.

## 60 Introduction

61 Both hypertension (HTN) and affective disorders, such as depression, frequently co-occur and  
62 have been identified as single <sup>1-4</sup> as well as combined <sup>5</sup> risk factors for cardiovascular disease (CVD).  
63 An increased risk of HTN has been described in patients with affective disorders <sup>6-10</sup>. The burden of  
64 vascular risk factors, including HTN, has further been suggested to drive depressive symptoms in ageing  
65 through microvascular brain damage <sup>11</sup>.

66 In contrast to these findings, some studies showed that higher blood pressure related to better mood,  
67 higher well-being and lower distress in healthy <sup>12-16</sup> and clinical populations <sup>17-19</sup>. Baroreceptor  
68 mechanisms have been suggested to explain these effects, as their intrinsic and experimentally-induced  
69 signalling has been shown to phasically adjust pain sensitivity thresholds, alter sensory and emotional  
70 processing, decrease cortical excitability and inhibit central nervous system activity <sup>20-26</sup>. These  
71 observations have been proposed as a critical neuro-behavioural component in the development of  
72 essential HTN. Momentary relief from an adverse state might positively reinforce blood pressure-  
73 elevating behaviours and thus, via baroreceptor-mediated neural circuits, insidiously increase blood  
74 pressure over time, resulting in ‘learned hypertension’ <sup>20,25,27-29</sup>. However, it remains unclear if blood  
75 pressure elevations and HTN development relate to mental health and if such an association reflects in  
76 brain function.

77 The first goal of the present study was to systematically describe the relationship of blood pressure with  
78 depressive symptoms and well-being, while accounting for potential confounding effects of medication  
79 intake and chronic illness, such as CVD and clinical depression. Due to small effect sizes reported in  
80 previous research related to our study <sup>16-18</sup>, we capitalized on the unique study design offered by the  
81 UK Biobank. The UK Biobank combines a deeply phenotyped longitudinal cohort with high statistical  
82 power of more than 500,000 participants <sup>30</sup> which enables the detection of robust small effects. In  
83 addition, it includes two follow-up timepoints for longitudinal analyses in two sub-samples of the  
84 baseline cohort: an online mental health follow-up at around 5 years and a follow-up at around 10 years.  
85 We hypothesized for cross-sectional and longitudinal analyses that increased blood pressure relates to  
86 fewer depressive symptoms and greater well-being (preregistration: <https://osf.io/638jg/>).

87 The second goal of this study was to explore the relevance of blood pressure-mental health associations  
88 in relation to HTN development. If a systematic relationship between mental health and blood pressure  
89 exists, this could positively reinforce long-term blood pressure elevations via baroreceptor mechanisms.  
90 Hence, we explored if the relationship between mental health and blood pressure differed between  
91 participants who developed hypertension compared to those who stayed normotensive.

92 The third goal of this study was to explore the prospective effects of blood pressure-mental health  
93 associations in emotion-related brain function using UK Biobank's imaging assessment (N > 20,000).  
94 Due to the previously established baroreceptor effects on central nervous processing, blood pressure  
95 elevations and the development of HTN might relate to more general affective processes in brain  
96 function. We therefore investigated the effect of blood pressure variations on emotional task-based  
97 functional MRI activation <sup>31,32</sup>.

## 98 Methods

99 This study was conducted using data from the UK Biobank (<http://www.ukbiobank.ac.uk/>) to  
100 investigate cross-sectional and longitudinal associations between blood pressure, hypertension and  
101 mental health in behaviour and brain. We were granted access to UK Biobank's data resource in May  
102 2018 after an initial application, but embargoed data access until we completed the preregistrations of  
103 this and related studies (date of initial data release 12 Feb 2019, preregistration of this study:  
104 <https://osf.io/638jg/>). All analyses and data visualisations were performed with R (4.0.2, R Core Team,  
105 2015, Vienna, Austria; [R-project.org/](https://www.r-project.org/)). To allow for replication studies and reproducibility of our  
106 results, the analysis code can be found in the Open Science Framework repository of this study  
107 (<https://osf.io/638jg/>).

### 108 UK Biobank study design

109 The UK Biobank is a publicly available, on-going longitudinal study which aims to comprehensively  
110 assess health-related indices of more than 500,000 UK citizens<sup>30</sup>. UK Biobank included participants  
111 from the UK between the ages of 40 and 69 years at recruitment in 2006 to 2010. The size of the cohort  
112 was determined based on statistical power calculations for nested case-control studies to achieve large  
113 incidences and reliable odds ratios of common health-related conditions during the first years of the 20-  
114 years follow-up period<sup>30</sup>.

115 The initial assessment of the whole cohort was conducted between 2006-2010 in 22 assessment centres  
116 throughout the UK. The complete assessment protocol was repeated at two other instances, specifically  
117 at first repeat assessment visit (2012-2013), and at imaging follow-up which included ongoing brain  
118 magnetic resonance imaging (MRI) assessments of 100,000 UK Biobank participants that has started  
119 in 2014<sup>33,34</sup>. In addition, a sub-sample of the baseline cohort participated in an online mental health  
120 follow-up assessment in 2016. For this study, we used data from the initial assessment visit (i.e., the  
121 baseline visit), the online mental health follow-up at around 5 years from baseline, as well as the follow-  
122 up imaging visit (i.e., the follow-up visit) at around 10 years from baseline (Figure 1).

**Variables at baseline**

**Variables at 10y follow-up**

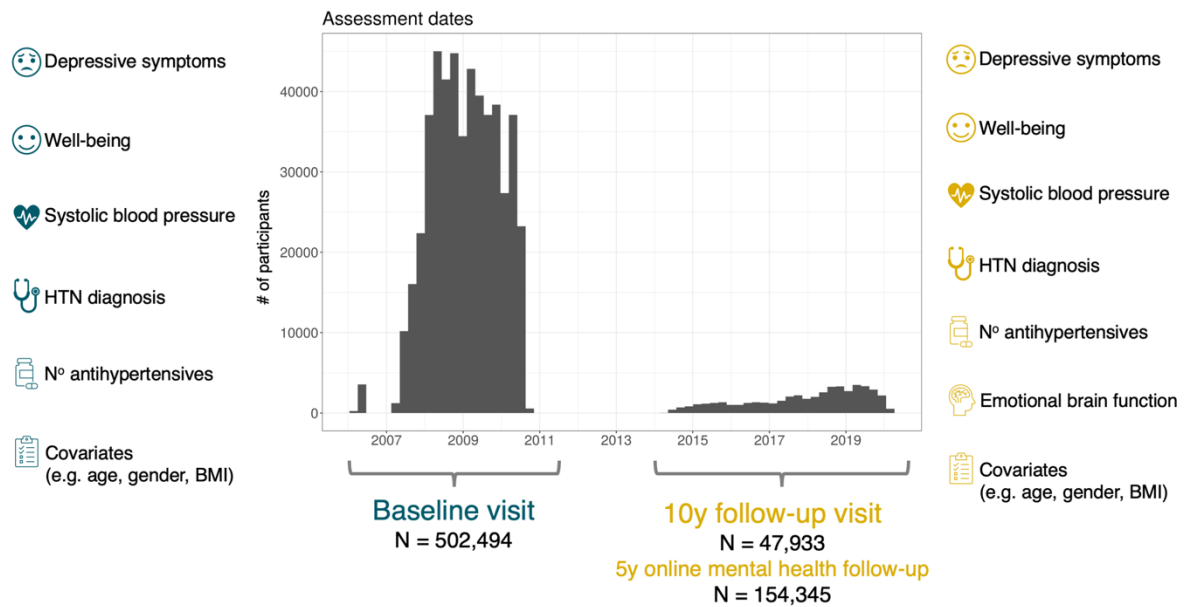

**Overview of analyses**

Cross-sectional:  $Y_{\text{Mental health}} = \beta_0 + \beta_1 \text{SBP} + \beta_2 \text{HTN} + \beta_3 \text{No. antihypertensives} + \beta_4 \text{Covariates} + \epsilon$

Longitudinal:  $Y_{\text{Mental health}} = \beta_0 + \beta_1 \text{SBP} + \beta_2 \text{HTN} + \beta_3 \text{No. antihypertensives} + \beta_4 \text{Covariates} + \epsilon$

Moderation:  $Y_{\text{Mental health}} = \beta_0 + \beta_1 \text{SBP} + \beta_2 \text{HTN} + \beta_3 \text{SBP} * \text{HTN} + \beta_4 \text{Covariates} + \epsilon$

Emotional brain function:  $Y_{\text{Brain activity}} = \beta_0 + \beta_1 \text{SBP} + \beta_2 \text{HTN} + \beta_3 \text{SBP} * \text{HTN} + \beta_4 \text{Covariates} + \epsilon$

123

124 *Figure 1 – Overview of study design, outcome and predictor variables and analyses.*

125

126 **Variables**

127 A set of questions and measures designed for the assessment of current and lifetime mental health and  
 128 psychosocial factors were administered at several instances during UK Biobank data acquisition<sup>35–37</sup>.

129 The following variables were included in this study (details on the UK Biobank data fields that were  
 130 used for each variable are reported in the Supplementary Materials):

131 *Outcomes*

132 *Current depressive symptoms*

133 During each assessment centre visit, frequency of current depressive symptoms in the last two weeks  
 134 (i.e., depressed mood, unenthusiasm, tenseness, tiredness) was assessed using a 4-point Likert scale  
 135 ranging from 0 (“not at all”) to 3 (“nearly every day”). The item scores were summarized as mean scores  
 136 for the purpose of this study. Questions regarding current depressive symptoms were assessed via a  
 137 touchscreen during baseline and follow-up assessment centre visits<sup>35–37</sup>.

138 We also preregistered analyses using the Patient Health Questionnaire 9-question version (PHQ-9)<sup>38</sup>  
139 from the online mental health follow-up assessment which a sub-sample of the whole UK Biobank  
140 cohort received<sup>35</sup>. In the online PHQ-9 questionnaire, severity of current depressive symptoms in the  
141 last two weeks was assessed. The analyses and results of this questionnaire were almost identical to the  
142 ones obtained from the main depressive symptoms outcome measure described above. Methods and  
143 results related to PHQ-9 are further reported in the Supplementary Materials.

#### 144 *Well-being*

145 Seven questions addressing different aspects of participants' well-being were included at the assessment  
146 centre visits. The questions asked how happy/satisfied participants were regarding their happiness, and  
147 health, work, family, friendship, and financial situation, respectively. Participants were asked to respond  
148 to the questions on a 6-point Likert scale ranging from 1 ("extremely happy") to 6 ("extremely  
149 unhappy"). For the purpose of this study, all item scores were recoded and summarized as mean scores  
150 with higher scores representing greater well-being.

#### 151 *Predictors*

##### 152 *Systolic blood pressure (SBP)*

153 Systolic and diastolic blood pressure readings were taken from all UK Biobank participants. At each  
154 assessment centre visit, two readings were recorded with an automated Omron 705 IT electronic blood  
155 pressure monitor (OMRON Healthcare Europe B.V. Kruisweg 577 2132 NA Hoofddorp). The two  
156 blood pressure readings were obtained during seated resting periods interleaved with a verbal interview  
157 on demographic and health-related data by UK Biobank staff. The procedure was conducted in the  
158 following sequence: 1) Interview Part 1 (demographic data), 2) First measurement of blood pressure,  
159 3) Interview Part 2 (diseases and medications), 4) Measurement of Pulse Wave Velocity, 5) Second  
160 measurement of blood pressure. A timer ensured the second blood pressure reading could not be taken  
161 until at least 1 minute had elapsed. We used the mean of the two readings to derive systolic (SBP) values  
162 per participant at baseline and follow-up visit.

##### 163 *Hypertension diagnosis (HTN)*

164 Complementary to blood pressure readings, we used a categorical measure of HTN diagnosis.  
165 Participants indicated on a touchscreen whether a doctor has ever told them that they have had high  
166 blood pressure. These self-reports were given at each assessment visit and used in this study as an  
167 assessment if a diagnosis of HTN was present (yes/no) at baseline and follow-up.

#### 168 *Number of antihypertensive medications*

169 In a nurse interview at each assessment visit, participants reported all medications they were currently  
170 taking. A physician from our team (LL) examined these medication lists and identified all  
171 antihypertensive drug classes (Supplementary Materials). We subsequently coded these  
172 antihypertensives and calculated a sum score for each participant, indicating the number of  
173 antihypertensive drugs taken. A higher number of antihypertensive medications suggests that different  
174 drug classes are required to counteract the effects of blood pressure dysregulation and thus serves as an  
175 indicator of HTN severity.

#### 176 *Additional variables used in exploratory analyses*

##### 177 *Definition of hypertension*

178 In the moderation analysis (see below), we aimed to explore the relevance of blood pressure-mental  
179 health associations in relation to HTN development. For this purpose, our approach was to define HTN  
180 as conservatively as possible to avoid 1) missing hypertensive cases and 2) confounding influences of  
181 antihypertensive intake. Hence, we defined hypertension for this analysis as either having a HTN  
182 diagnosis (as described above) or using any antihypertensive medication. For the moderation analysis,  
183 this definition was used for exclusion of participants with hypertension at baseline to select a non-  
184 hypertensive sample at baseline. At follow-up, this definition was used to define which participants  
185 became hypertensive between baseline and follow-up (i.e. having a HTN diagnosis at follow-up or  
186 taking antihypertensives at follow-up) and who stayed normotensive.

##### 187 *Imaging-derived phenotypes (IDPs)*



188 For analyses relating to brain function, we utilised the imaging-derived phenotypes (IDPs) available in  
189 UK Biobank which have been generated by processing the raw neuroimaging data. Magnetic resonance  
190 imaging (MRI) was performed at 3 Tesla and details of the imaging protocols and data processing  
191 procedures have been described in detail elsewhere<sup>33,34</sup>. In brief, the functional MRI task that was  
192 implemented in UK Biobank is the Hariri “emotion” task<sup>31,32</sup>. Participants were presented with blocks  
193 of trials and asked to decide either which of two faces presented on the bottom of the screen match the  
194 face at the top of the screen, or which of two shapes presented at the bottom of the screen match the  
195 shape at the top of the screen. The faces had either an angry or fearful expression. Trials were presented  
196 in blocks of 6 trials of the same condition (faces or shapes), with the stimulus presented for 2000 ms  
197 and a 1000 ms inter-trial interval. Each block was preceded by a 2000 ms task cue (“shape” or “face”),  
198 so that each block was 21 seconds including the cue. Each of the two runs included 3 face blocks and 3  
199 shape blocks, with 8 seconds of fixation at the end of each run. IDPs of the Hariri task reflect the strength  
200 of response to the stimuli within a given brain region using the blood oxygenation level dependent  
201 (BOLD) contrast. BOLD fMRI relies on regional differences in haemoglobin oxygenation (more  
202 precisely local concentration changes of deoxy-haemoglobin) to measure regional brain activity<sup>39-41</sup>.  
203 Here, we focused on the IDPs of significant clusters in amygdala and whole-brain activation for the  
204 faces > shapes contrast (median z-statistics of BOLD activation), which reflects the emotional brain  
205 response.

### 206 *Covariates*

207 To adjust for confounding factors, we included the following variables as covariates in the analyses:  
208 age, gender, body mass index (BMI), resting heart rate, diabetes diagnosed by doctor (yes/no), lifetime  
209 depression diagnosed by doctor (yes/no), angina diagnosed by doctor (yes/no), myocardial infarction  
210 diagnosed by doctor (yes/no). Note that we refer to the variable *gender* and not sex, as the UK Biobank  
211 defines this variable as a mixture of the sex the NHS had recorded for the participant and self-reported  
212 sex, although we acknowledge that this does not capture the full spectrum of gender.

213 **Statistical methods**

214 We performed cross-sectional and longitudinal multiple linear regression models. For cross-sectional  
215 comparisons, we used data of the initial assessment visit. Outcomes were current depressive symptoms  
216 and well-being, respectively. SBP, HTN and the number of antihypertensives were entered  
217 simultaneously as predictors. For longitudinal comparisons, we predicted outcome measures (i.e.  
218 depressive symptoms and well-being) assessed at the follow-up visit from predictors assessed at the  
219 initial assessment visit (i.e. SBP, HTN and the number of antihypertensives). The analyses were  
220 performed for the total sample, as well as for a subset of participants with HTN diagnosis. All statistical  
221 models included the same covariates from initial assessment visit (specified above, i.e., age, gender,  
222 BMI, resting heart rate, history of diabetes, angina, myocardial infarction, and lifetime depression).  
223 Missing data were listwise excluded and outcomes, predictors and covariates were z-scored. In all  
224 models, we have also assessed any potential influence of multicollinearity by evaluating the Variance  
225 Inflation Factor (VIF). The VIFs never exceeded a value of 2, which indicates that multicollinearity is  
226 low and inferences from our models are likely not biased due to correlations among the variables  
227 included.

228 *Sensitivity analyses*

229 We investigated the sensitivity of effects by inclusion and exclusion of participants with diseases which  
230 often affect blood pressure and/or mental health. As such, we considered diagnoses of HTN, non-bipolar  
231 depression, and severe neurological, systemic, or psychiatric diseases (e.g., stroke, CVD, renal diseases,  
232 schizophrenia; see Supplementary Materials for a complete list of diseases). We thus performed the  
233 same multiple linear regression models described above separately for groups of participants with or  
234 without any of these diseases.

235 We furthermore assessed whether the relationship of blood pressure and mental health was dependent  
236 on the intake of antidepressants, or any other medication intake. Again, in separate multiple regression  
237 models of groups of participants taking or not taking these medications, we added SBP, HTN and  
238 number of antihypertensive medications simultaneously as predictors of depressive symptoms and well-  
239 being and corrected the models with the same covariates as described in the analyses above.

240 In addition, we tested whether there was a specific effect of antidepressant or antihypertensive drug  
241 classes on the relationship of blood pressure and mental health (see Supplementary Materials for list of  
242 medication classes). For these analyses, we categorised antidepressants and antihypertensives according  
243 to their mechanisms of action. In separate multiple regression models, we added SBP, HTN and a  
244 categorical variable coding for the medication classes simultaneously as predictors of depressive  
245 symptoms and well-being and corrected the models with the same covariates as described in the  
246 analyses above

247 All sensitivity analyses were performed on the baseline sample with measures from the initial  
248 assessment visit.

#### 249 *Exploratory analyses*

##### 250 *Moderation of the BP-mental health relationship by the development of hypertension*

251 Using moderation analysis, we explored whether the relationship between SBP and mental health was  
252 dependent on hypertension status at follow-up assessment. For this analysis, we only included  
253 participants who were not hypertensive at baseline, as defined by a HTN diagnosis or intake of  
254 antihypertensive medications at this timepoint. We then compared the relationship between SBP and  
255 mental health in participants who developed hypertension (i.e., received a hypertension diagnosis or  
256 started taking antihypertensives) until the follow-up assessment, with those who stayed normotensive.  
257 The moderation analysis was performed through a multiple linear regression model including  
258 depressive symptoms or well-being as outcomes, respectively, and the interaction term of SBP at initial  
259 visit and hypertension at follow-up as predictor<sup>42</sup>. We also included the following covariates: age at  
260 initial visit, gender, and BMI at initial visit.

##### 261 *Associations with emotion-related brain function*

262 Complementary to self-reports of mental health, we explored the prospective effects of elevated blood  
263 pressure on emotion-related brain function as a central nervous outcome measure of emotional  
264 reactivity. As described in the introduction, we would expect blood pressure elevations to relate to  
265 altered neural processing of affective stimuli due to baroreceptor effects. Measures of brain function

266 included BOLD fMRI activation in significant clusters in the amygdala and whole-brain analyses (see  
267 section above *Variables*)

268 We used these measures as outcomes in two-sided t-tests comparing groups of participants with and  
269 without HTN, as well as in multiple linear regression models, which included SBP at follow-up (i.e.,  
270 imaging visit), as well as age, gender, and BMI as covariates. In the linear regression models, we further  
271 included the interaction of SBP and HTN diagnosis at follow-up as predictor to test if the relationship  
272 between blood pressure levels and emotional reactivity differs between individuals who became  
273 hypertensive and those who did not (see also section above *Moderation of the BP-mental health*  
274 *relationship by development of hypertension*).

275 **Results**

276 **Participants**

277 Overall, there were data of 502,494 participants (273,378 [54.4%] women) at initial assessment visit of  
 278 whom 47,933 (24,793 [51.7%] women) participants attended the follow-up visit. (Table 1) Average  
 279 time between initial assessment and follow-up assessment was approximately 9 years (mean=3261 days  
 280 [8.9 years], range=1400-5043 days [3.8-13.8 years]). At baseline, the median age was 58 years  
 281 (range=37-73 years) and 135,745 (27%) participants reported that they had previously been diagnosed  
 282 with HTN (Table 1). The final sample size for each analysis after exclusion of missing data is reported  
 283 in the respective results sections below.

284 **Descriptive data**

285 As shown in Table 1, participants with and without HTN diagnosis differed with respect to all  
 286 descriptive variables at initial assessment. Missing data were evident in all variables of interest with  
 287 varying impact (SBP 45,540 [9.1%]), HTN 930 [0.2%]), depressive symptoms 53,563 [10.7%], and  
 288 well-being 385,271 [76.7%]). At follow-up assessment, missing data were evident for SBP (11,269  
 289 [23.5%]), HTN (36,264 [75.7%]), depressive symptoms (3,285 [6.9%]), and well-being (371 [0.8%]).  
 290 Missing data were listwise excluded and all following analyses conducted on complete-case datasets.  
 291 To account for bias due to missing data, we imputed data and conducted sensitivity analyses on the  
 292 entire sample, which are reported in the Supplement. The results from imputed datasets indicated no  
 293 sign of bias due to missing data and replicated our results from complete-case analyses (Supplementary  
 294 Table 2).

295 *Table 1 – Sample characteristics at baseline assessment for total sample, as well as sub-groups with*  
 296 *and without diagnosed hypertension (HTN). P-values and effect sizes refer to the comparison of HTN*  
 297 *sub-groups for the respective variable. Effect sizes are specified as Cohen’s d for interval scale*  
 298 *variables and Cramér’s V for nominal scale variables.*

|                    | Overall<br>(N=502494) | No diagnosed HTN<br>or unknown<br>(N=365819) | Diagnosed HTN<br>(N=135745) | P-value | Effect<br>size |
|--------------------|-----------------------|----------------------------------------------|-----------------------------|---------|----------------|
| <b>Gender</b>      |                       |                                              |                             |         |                |
| Female             | 273378 (54.4%)        | 206978 (56.6%)                               | 65932 (48.6%)               | <0.001  | 0.05           |
| Male               | 229115 (45.6%)        | 158841 (43.4%)                               | 69813 (51.4%)               |         |                |
| Missing            | 1 (0.0%)              | 0 (0%)                                       | 0 (0%)                      |         |                |
| <b>Age (years)</b> |                       |                                              |                             |         |                |

Schaare et al.

Mental health and blood pressure

|                                        |                   |                   |                   |        |       |
|----------------------------------------|-------------------|-------------------|-------------------|--------|-------|
| Mean (SD)                              | 56.5 (8.10)       | 55.4 (8.18)       | 59.5 (7.09)       | <0.001 | 0.508 |
| Median [Min, Max]                      | 58.0 [37.0, 73.0] | 56.0 [38.0, 73.0] | 61.0 [39.0, 72.0] |        |       |
| Missing                                | 1 (0.0%)          | 0 (0%)            | 0 (0%)            |        |       |
| <b>Systolic blood pressure (mmHg)</b>  |                   |                   |                   |        |       |
| Mean (SD)                              | 138 (18.6)        | 134 (17.6)        | 147 (18.1)        | <0.001 | 0.725 |
| Median [Min, Max]                      | 136 [65.0, 254]   | 133 [65.0, 253]   | 146 [79.0, 254]   |        |       |
| Missing                                | 45540 (9.1%)      | 32394 (8.9%)      | 12737 (9.4%)      |        |       |
| <b>Diastolic blood pressure (mmHg)</b> |                   |                   |                   |        |       |
| Mean (SD)                              | 82.2 (10.1)       | 80.7 (9.69)       | 86.2 (10.2)       | <0.001 | 0.56  |
| Median [Min, Max]                      | 82.0 [36.5, 148]  | 80.5 [36.5, 140]  | 86.0 [43.5, 148]  |        |       |
| Missing                                | 45528 (9.1%)      | 32387 (8.9%)      | 12732 (9.4%)      |        |       |
| <b>Heart rate (beats/min)</b>          |                   |                   |                   |        |       |
| Mean (SD)                              | 69.3 (11.2)       | 68.7 (10.7)       | 70.9 (12.4)       | <0.001 | 0.192 |
| Median [Min, Max]                      | 68.5 [30.5, 173]  | 68.0 [30.5, 173]  | 70.0 [30.5, 170]  |        |       |
| Missing                                | 45528 (9.1%)      | 32387 (8.9%)      | 12732 (9.4%)      |        |       |
| <b>BMI (kg/m<sup>2</sup>)</b>          |                   |                   |                   |        |       |
| Mean (SD)                              | 27.4 (4.80)       | 26.7 (4.41)       | 29.4 (5.25)       | <0.001 | 0.584 |
| Median [Min, Max]                      | 26.7 [12.1, 74.7] | 26.1 [12.1, 69.0] | 28.6 [13.8, 74.7] |        |       |
| Missing                                | 3105 (0.6%)       | 1780 (0.5%)       | 928 (0.7%)        |        |       |
| <b>Diabetes</b>                        |                   |                   |                   |        |       |
| Prefer not to answer                   | 404 (0.1%)        | 347 (0.1%)        | 57 (0.0%)         | <0.001 | 0.135 |
| Do not know                            | 1280 (0.3%)       | 726 (0.2%)        | 554 (0.4%)        |        |       |
| No                                     | 473479 (94.2%)    | 354961 (97.0%)    | 118518 (87.3%)    |        |       |
| Yes                                    | 26399 (5.3%)      | 9785 (2.7%)       | 16614 (12.2%)     |        |       |
| Missing                                | 932 (0.2%)        | 0 (0%)            | 2 (0.0%)          |        |       |
| <b>Angina</b>                          |                   |                   |                   |        |       |
| No diagnosed angina or unknown         | 358910 (71.4%)    | 233569 (63.8%)    | 124955 (92.1%)    | <0.001 | 0.06  |
| Diagnosed angina                       | 16117 (3.2%)      | 6735 (1.8%)       | 9370 (6.9%)       |        |       |
| Missing                                | 127467 (25.4%)    | 125515 (34.3%)    | 1420 (1.0%)       |        |       |
| <b>Heart attack</b>                    |                   |                   |                   |        |       |
| No diagnosed heart attack or unknown   | 363524 (72.3%)    | 234891 (64.2%)    | 128249 (94.5%)    | <0.001 | 0.039 |
| Diagnosed heart attack                 | 11503 (2.3%)      | 5413 (1.5%)       | 6076 (4.5%)       |        |       |
| Missing                                | 127467 (25.4%)    | 125515 (34.3%)    | 1420 (1.0%)       |        |       |
| <b>Lifetime depression</b>             |                   |                   |                   |        |       |
| No diagnosed depression or unknown     | 346919 (69.0%)    | 220783 (60.4%)    | 125778 (92.7%)    | <0.001 | 0.02  |
| Diagnosed depression                   | 28108 (5.6%)      | 19521 (5.3%)      | 8547 (6.3%)       |        |       |
| Missing                                | 127467 (25.4%)    | 125515 (34.3%)    | 1420 (1.0%)       |        |       |
| <b>No. antihypertensive medication</b> |                   |                   |                   |        |       |
| Mean (SD)                              | 0.403 (0.864)     | 0.0842 (0.405)    | 1.26 (1.14)       | <0.001 | 1.717 |
| Median [Min, Max]                      | 0.00 [0.00, 9.00] | 0.00 [0.00, 8.00] | 1.00 [0.00, 9.00] |        |       |
| <b>No. antidepressant medication</b>   |                   |                   |                   |        |       |
| Mean (SD)                              | 0.0784 (0.281)    | 0.0700 (0.266)    | 0.101 (0.318)     | <0.001 | 0.111 |
| Median [Min, Max]                      | 0.00 [0.00, 5.00] | 0.00 [0.00, 3.00] | 0.00 [0.00, 5.00] |        |       |
| <b>Current depressive symptoms</b>     |                   |                   |                   |        |       |
| Mean (SD)                              | 1.40 (0.528)      | 1.39 (0.513)      | 1.44 (0.564)      | <0.001 | 0.106 |

Schaare et al.

Mental health and blood pressure

|                               |                   |                   |                   |        |       |
|-------------------------------|-------------------|-------------------|-------------------|--------|-------|
| Median [Min, Max]             | 1.25 [1.00, 4.00] | 1.25 [1.00, 4.00] | 1.25 [1.00, 4.00] |        |       |
| Missing                       | 53563 (10.7%)     | 36900 (10.1%)     | 15745 (11.6%)     |        |       |
| <b>Well-being</b>             |                   |                   |                   |        |       |
| Mean (SD)                     | 4.46 (0.579)      | 4.48 (0.571)      | 4.41 (0.598)      | <0.001 | 0.133 |
| Median [Min, Max]             | 4.50 [1.00, 6.00] | 4.50 [1.00, 6.00] | 4.40 [1.00, 6.00] |        |       |
| Missing                       | 330042 (65.7%)    | 240332 (65.7%)    | 88780 (65.4%)     |        |       |
| <b>Diagnosed hypertension</b> |                   |                   |                   |        |       |
| No diagnosed HTN or unknown   | 365819 (72.8%)    | 365819 (100%)     | 0 (0%)            | -      | -     |
| Diagnosed HTN                 | 135745 (27.0%)    | 0 (0%)            | 135745 (100%)     |        |       |
| Missing                       | 930 (0.2%)        | 0 (0%)            | 0 (0%)            |        |       |

299

### 300 Outcome data

301 At initial assessment, self-reported current depressive symptoms resulted in a mean score of 1.40 (SD  
 302 = 0.53) and well-being in a mean score of 4.46 (SD = 0.58). At follow-up, depressive symptoms were  
 303 reported with mean score of 1.30 (SD = 0.44) and well-being with a mean score of 4.63 (SD = 0.54).

304 Among participants who completed both initial and follow-up assessments (N = 47,933), correlation  
 305 analyses revealed positive associations between baseline and follow-up measures for both depressive  
 306 symptoms (Pearson  $r = 0.529$ ,  $p < 0.001$ ) and well-being (Pearson  $r = 0.675$ ,  $p < 0.001$ ), respectively.  
 307 Thus, test-retest reliability of mood assessments was high, indicating stability over assessment  
 308 timepoints.

309

### 310 Main results

#### 311 *Cross-sectional associations of systolic blood pressure, diagnosed hypertension, and* 312 *antihypertensive medication intake with depressive symptoms and well-being*

313 For the multiple linear regression testing cross-sectional associations of SBP, HTN, and number of  
 314 antihypertensive medications with depressive symptoms 303,771 participants could be included in the  
 315 model, while 129,876 could be included for the multiple linear regression model with well-being as  
 316 outcome. At baseline (Figure 2), results of multiple linear regression models showed that SBP was  
 317 negatively related to depressive symptoms ( $\beta = -0.063$ ; 95% CI [-0.067, -0.060];  $p < 0.001$ ) and  
 318 positively associated with well-being ( $\beta = 0.057$ ; 95% CI [0.051, 0.063];  $p < 0.001$ ). Inversely, HTN was  
 319 related to more depressive symptoms ( $\beta = 0.043$ ; 95% CI [0.039, 0.047];  $p < 0.001$ ) and poorer well-

320 being ( $\beta = -0.057$ ; 95% CI [-0.064, -0.050];  $p < 0.001$ ). Restricting the analyses to participants with HTN  
 321 only ( $N = 107,192$ ), yielded similar associations of higher SBP with fewer depressive symptoms ( $\beta = -$   
 322  $0.054$ ; 95% CI [-0.060, -0.048];  $p < 0.001$ ) and greater well-being ( $N = 45,319$ ), respectively ( $\beta = 0.041$ ;  
 323 95% CI [0.032, 0.050];  $p < 0.001$ ). Furthermore, our analyses yielded a small negative relationship  
 324 between the number of antihypertensive medications taken and depressive symptoms ( $\beta = -0.006$ ; 95%  
 325 CI [-0.011, -0.001];  $p = 0.012$ ), and a positive trend with well-being ( $\beta = 0.007$ ; 95% CI [0.000, 0.015];  
 326  $p = 0.046$ ). In the analyses of participants with HTN, higher numbers of antihypertensive medications  
 327 were similarly associated with fewer depressive symptoms ( $\beta = -0.015$ ; 95% CI [-0.022, -0.009];  
 328  $p < 0.001$ ) and with greater well-being ( $\beta = 0.010$ ; 95% CI [0.000, 0.020];  $p = 0.043$ ).

329 Overall, the model for depressive symptoms including all participants yielded a model fit of  $\text{adj. } R^2 =$   
 330  $0.129$ , which indicated an increase in model fit of  $\Delta \text{adj. } R^2 = 0.004$  from a null model consisting only  
 331 of covariates (well-being  $\text{adj. } R^2 = 0.088$ ,  $\Delta \text{adj. } R^2 = 0.004$ ; HTN only: depressive symptoms  $\Delta \text{adj. } R^2$   
 332  $= 0.003$ , well-being  $\Delta \text{adj. } R^2 = 0.002$ ).

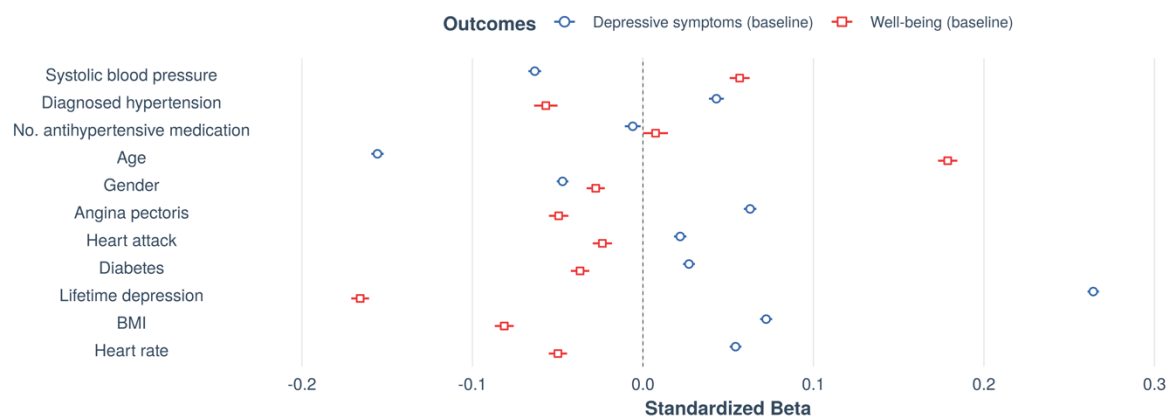

333  
 334 *Figure 2 – Cross-sectional associations with mental health outcomes at initial assessment. Forest plot*  
 335 *shows standardized beta estimates and 95% confidence intervals for predictors of interest (systolic*  
 336 *blood pressure, diagnosed hypertension (HTN), and number of antihypertensives) as well as covariates.*  
 337  *$N = 303,771$  for current depressive symptoms and  $N = 129,876$  for well-being (after exclusion of*  
 338 *missing values).*

339



340 *Longitudinal associations of systolic blood pressure, diagnosed hypertension, and antihypertensive*  
341 *medication intake with depressive symptoms and well-being*

342 For the multiple linear regression testing longitudinal associations of SBP, HTN, and number of  
343 antihypertensive medications with depressive symptoms 28,021 participants could be included in the  
344 model, while 29,966 could be included for the multiple linear regression model with well-being as  
345 outcome. Longitudinally (Figure 3), we found that higher SBP was related to fewer depressive  
346 symptoms at follow-up assessment ( $\beta = -0.042$ ; 95% CI  $[-0.055, -0.029]$ ;  $p < 0.001$ ) and to higher follow-  
347 up well-being scores ( $\beta = 0.033$ ; 95% CI  $[0.020, 0.046]$ ;  $p < 0.001$ ). Similar to the cross-sectional results,  
348 baseline HTN was associated with more depressive symptoms approximately 10 years later ( $\beta = 0.029$ ;  
349 95% CI  $[0.014, 0.044]$ ;  $p < 0.001$ ). HTN was also significantly related to lower well-being scores at  
350 follow-up ( $\beta = -0.032$ ; 95% CI  $[-0.047, -0.017]$ ;  $p < 0.001$ ). Number of antihypertensive medications at  
351 baseline was not a significant predictor in any longitudinal model (depressive symptoms:  $\beta = -0.006$ ;  
352 95% CI  $[-0.022, 0.009]$ ;  $p = 0.418$ ; well-being:  $\beta = -0.004$ ; 95% CI  $[-0.019, 0.011]$ ;  $p = 0.620$ ). The model  
353 fit for the prediction of depressive symptoms increased from a null model consisting only of covariates  
354 by  $\Delta \text{adj. } R^2 = 0.001$  (adj.  $R^2 = 0.092$ ; well-being adj.  $R^2 = 0.055$ ,  $\Delta \text{adj. } R^2 = 0.001$ ).

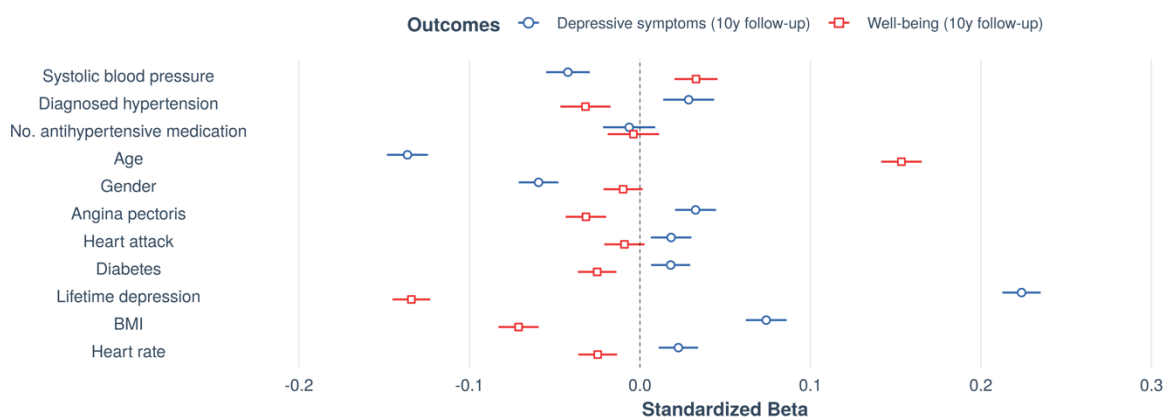

355

356 *Figure 3 – Longitudinal associations with mental health outcomes at follow-up assessment. Forest plot*  
357 *shows standardized beta estimates and 95% confidence intervals for predictors of interest at baseline*  
358 *(systolic blood pressure, diagnosed hypertension (HTN), and number of antihypertensives) as well as*  
359 *covariates. N = 28,021 for current depressive symptoms and N = 29,966 for well-being (after exclusion*  
360 *of missing values).*

361

362 *Additional and sensitivity analyses*

363 We performed several additional analyses to test the robustness of these results. Additional analyses  
364 included i) using the PHQ-9 questionnaire as a validated instrument to assess current depressive  
365 symptoms, ii) additional relevant covariates, such as socioeconomic status, insomnia, racial/ethnic  
366 background, insomnia, etc., iii) using hospital inpatient data for diagnoses of HTN and depression, iv)  
367 assessment of potential survival bias and v) exploration of potential unmeasured confounding effects  
368 with E-values. Moreover, sensitivity analyses were performed to test whether the above reported results  
369 were dependent on vi) the presence or absence of previous diagnosis of depression or any other severe  
370 disease that might affect BP (list of diseases in Supplementary Materials); vii) the intake of  
371 antidepressants or any other medication intake; viii) a specific effect of certain antidepressant or  
372 antihypertensive drug classes.

373 The results of all additional and sensitivity analyses are reported in the Supplementary Materials. In  
374 sum, the results were overall robust and consistent: independent of any potential confounders including  
375 medication intake, there was an effect of higher SBP on fewer depressive symptoms and higher well-  
376 being, as well as a negative effect of HTN diagnosis on mental health.

377 *Exploratory analyses*

378 *Moderation of the BP-mental health relationship by development of hypertension*

379 Next, we explored if the relationship between mental health and SBP was moderated by hypertension  
380 status at follow-up assessment. First, we excluded participants who were hypertensive at the initial  
381 assessment (defined as HTN diagnosis or intake of antihypertensives). This resulted in 315,582 people  
382 who could be considered non-hypertensive at initial assessment and who were included in the analysis  
383 (of those, N = 25,991 had data available to define hypertension at follow-up). Across all participants,  
384 SBP increased from initial assessment to follow-up (Figure 4A, mean increase = 3.820 mmHg;  $t =$   
385 38.996; degrees of freedom = 25578; 95% CI [3.628, 4.012];  $p < 0.001$ ). People who later developed  
386 HTN already had higher SBP levels at initial assessment compared to people who stayed normotensive  
387 (Figure 4B, HTN: mean baseline SBP (SD) = 148 (18.7) mmHg; no HTN: mean baseline SBP (SD) =  
388 130 (15.3) mmHg). Notably, in unadjusted models, there were no significant group differences in

389 mental health at initial assessment between people who developed HTN and those who stayed  
390 normotensive (Figure 4C, HTN: mean depressive symptoms = 1.333; no HTN: mean depressive  
391 symptoms = 1.327;  $t = -0.738$ ; degrees of freedom = 4585.9; 95% CI [-0.023, 0.010];  $p=0.464$ ; Figure  
392 4D, HTN: mean well-being = 4.536; no HTN: mean well-being = 4.547;  $t = 0.662$ ; degrees of freedom  
393 = 1583.8; 95% CI [-0.022, 0.044];  $p=0.508$ ). However, in the fully adjusted regression model, we  
394 observed a main effect of later HTN on baseline mental health (Figure 4C, depressive symptoms:  $\beta =$   
395 0.060; 95% CI [0.045, 0.076];  $p<0.001$ ; Figure 4D, well-being:  $\beta = -0.043$ ; 95% CI [-0.068, -0.017];  
396  $p<0.001$ ), suggesting that when adjusting for SBP levels, people who later developed HTN had lower  
397 mood (i.e. more depressive symptoms and lower well-being) already at initial assessment compared to  
398 people without HTN. The regression model further yielded a significant interaction of SBP at initial  
399 assessment and HTN at follow-up with depressive symptoms at initial assessment, showing that the  
400 association between SBP and depressive symptoms was moderated by hypertension status at follow-up  
401 (Figure 4E,  $\beta = -0.014$ ; 95% CI [-0.026, -0.003];  $p=0.015$ ). Thus, the slope of the relationship between  
402 higher SBP and fewer depressive symptoms was steeper in those participants who developed HTN  
403 approximately 10 years later. At follow-up, however, HTN status was not a significant moderator for  
404 the association of SBP and depressive symptoms ( $\beta = -0.005$ ; 95% CI [-0.016, 0.007];  $p=0.419$ ).  
405 Similarly, a trend of a moderation by HTN status was observed for the association between well-being  
406 and SBP at initial assessment, but this effect was not significant (Figure 4F,  $\beta = 0.017$ ; 95% CI [-0.001,  
407 0.036];  $p=0.070$ ). Neither was there a moderation by HTN status for the association between well-being  
408 at follow-up and SBP at follow-up ( $\beta = 0.002$ ; 95% CI [-0.010, 0.013];  $p=0.770$ ).

409 We replicated these findings using SBP > 140 mmHg as an additional criterion to define hypertension.  
410 This resulted in a sample where the two groups had SBP levels in the normotensive range at baseline.  
411 The results within this sample remained virtually unchanged and are reported in detail in the  
412 Supplementary Results.

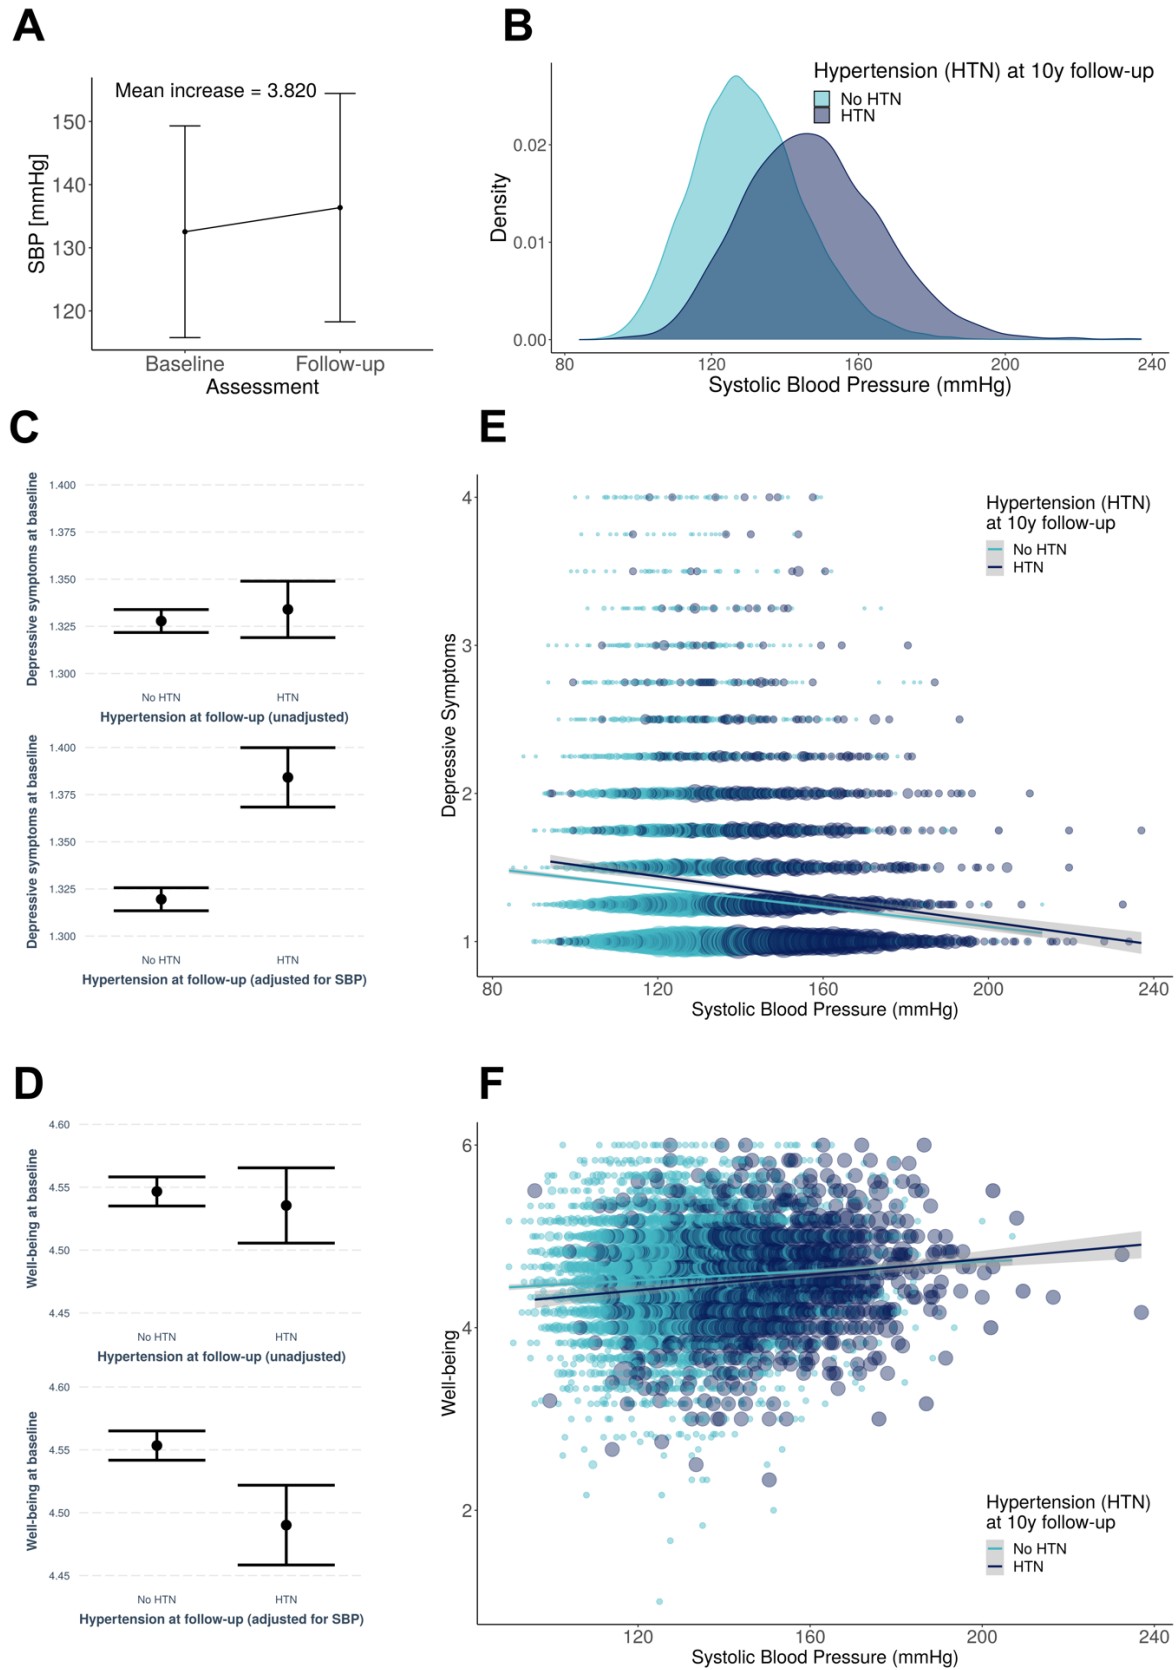

413

414 *Figure 4 – Association between mental health and systolic blood pressure at initial assessment*  
 415 *moderated by hypertension status at follow-up (i.e. approximately 10 years later). A: Across all*  
 416 *participants (excluding those with HTN and use of antihypertensives), systolic blood pressure increased*

417 *from baseline to follow-up. B: People who developed hypertension until follow-up (i.e. received a*  
418 *hypertension diagnosis or started taking antihypertensives) until the follow-up assessment (dark blue*  
419 *colour) already showed higher systolic blood pressure levels at initial assessment, despite not having*  
420 *been diagnosed at this timepoint, yet. C: No significant difference between groups in depressive*  
421 *symptoms at baseline (top), but when controlling for SBP, HTN developers showed more depressive*  
422 *symptoms (bottom). D: No significant difference between groups in well-being at baseline (top), but*  
423 *when controlling for SBP, HTN developers showed lower well-being (bottom). E: Participants who*  
424 *developed hypertension (dark blue colour) had a steeper negative slope for the relationship between*  
425 *blood pressure and depressive symptoms than those participants who stayed non-hypertensive (light*  
426 *blue colour). F: Similar trend for well-being in the expected opposite direction.*

427

#### 428 *Associations with emotion-related brain function*

429 Finally, to explore a central nervous representation of emotional reactivity, we assessed how  
430 hypertension status relates to emotional processing in the brain using fMRI activity assessed during the  
431 Hariri task. BOLD fMRI activity to emotional faces was lower in the amygdala (HTN = 1.134; no HTN  
432 = 1.249;  $t = 9.797$ ; degrees of freedom = 15,129; 95% CI [0.091, 0.137];  $p < 0.001$ ) and in significant  
433 regions resulting from whole-brain analyses (HTN = 2.322; no HTN = 2.592;  $t = 14.528$ ; degrees of  
434 freedom = 14,888; 95% CI [0.233, 0.306];  $p < 0.001$ ) in people with HTN compared to normotensives  
435 (Figure 5 left panels). We also observed a negative association between lower BOLD reactivity to  
436 emotional faces and higher SBP across participants, suggesting a continuously negative effect of SBP  
437 on BOLD (amygdala:  $\beta = -0.041$  95% CI [-0.054, -0.028];  $p < 0.001$ ; whole-brain:  $\beta = -0.032$  95% CI [-  
438 0.045, -0.019];  $p < 0.001$ , Figure 5 middle panels). Additionally, an interaction of HTN and SBP  
439 suggested that the negative association between SBP and whole-brain BOLD activity was less  
440 pronounced in people with HTN (whole-brain:  $\beta = 0.015$  95% CI [0.003, 0.028];  $p = 0.014$ ; trend in  
441 amygdala:  $\beta = 0.024$  95% CI [-0.001, 0.024];  $p = 0.063$ ; Figure 5 right panels). We repeated the same  
442 analysis using the blood pressure measurement at initial assessment which was acquired ~10 years prior  
443 to neuroimaging and thus not directly related to blood flow and volume dependent effects during BOLD  
444 fMRI. Interestingly, already the baseline SBP (i.e., prior to any HTN diagnosis) was negatively  
445 correlated with BOLD reactivity to emotional faces. In addition, there was an interaction of baseline  
446 SBP and later HTN on emotion-related brain activity, specifically in amygdala regions ( $\beta = 0.017$ ; 95%  
447 CI [0.004, 0.030];  $p = 0.009$ ), suggesting that the negative correlation between SBP at baseline and  
448 emotion-related amygdala activity was dampened in participants who developed hypertension. The

449 interaction between baseline SBP and BOLD activity was not significant in the whole-brain analysis ( $\beta$   
450 = 0.008; 95% CI [-0.005, 0.021];  $p=0.213$ ).

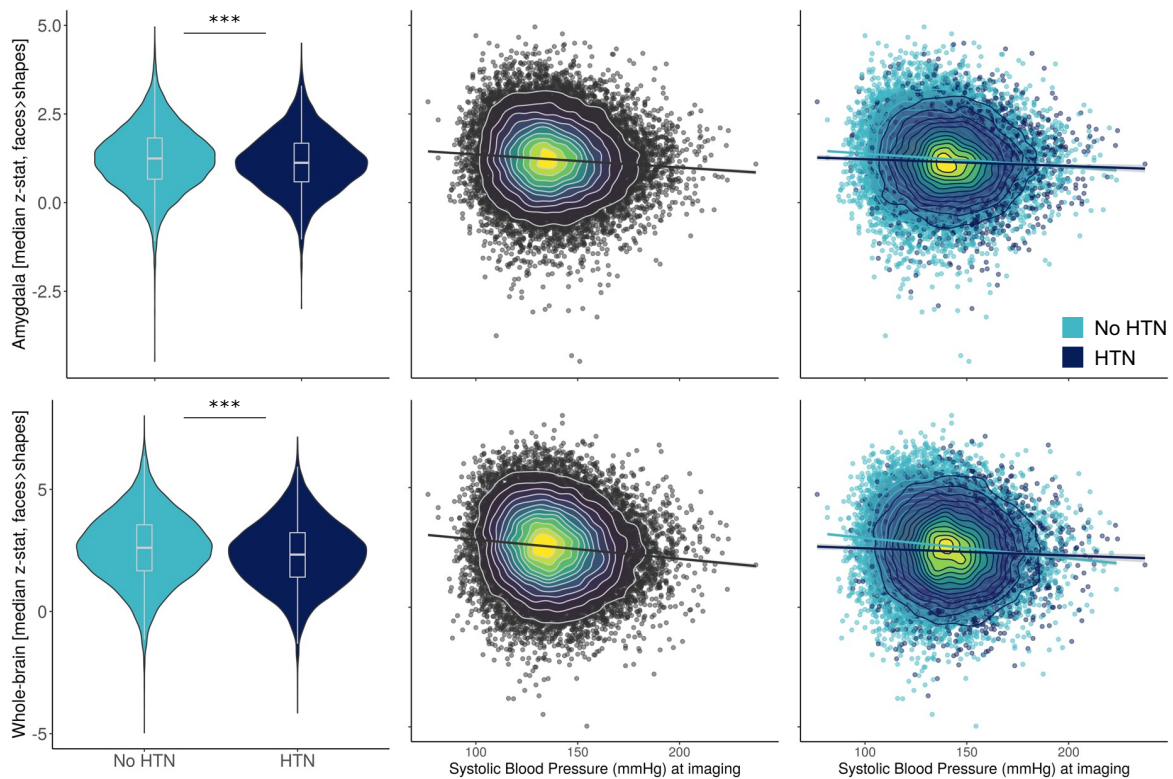

451

452 *Figure 5 – Association between systolic blood pressure and emotion-related brain function (assessed*  
453 *at follow-up approximately 10 years later). Left column (violin plots) shows group differences in Hariri*  
454 *task activity by hypertension status (HTN) at follow-up/imaging visit. Middle column shows negative*  
455 *correlations between blood pressure and BOLD fMRI activation in the faces>shapes contrast of the*  
456 *Hariri task in amygdala mask and whole-brain mask. The colour gradient represents the density of data*  
457 *points. Right column shows the same, but grouped by HTN at follow-up. Dark blue colours represent*  
458 *people who became hypertensive from baseline to follow-up. Light blue colours represent participants*  
459 *who stayed normotensive. The negative correlation between systolic blood pressure and emotion-*  
460 *related activity was flattened in participants who had developed hypertension.*

461 **Discussion**

462 In this study, we confirmed two seemingly contradictory associations of high blood pressure  
463 with mental health: (i) Higher SBP was associated with fewer depressive symptoms and greater well-  
464 being at the initial exam as well as at the 5-year mental health online follow-up and the 10-year follow-  
465 up including imaging, whereas (ii) the presence of a HTN diagnosis was associated with greater  
466 depressive symptoms and lower well-being. Given the well-powered cohort of the UK Biobank, we  
467 were able to perform sensitivity analyses which confirmed that the observed associations were robust  
468 to influences of medication intake (e.g., antihypertensives, antidepressants) and chronic diseases (e.g.,  
469 CVD, clinical depression). Strikingly, we furthermore found that (iii) already at the initial exam, among  
470 normotensive individuals, mental health was negatively affected (more depressive symptoms, lower  
471 well-being) by the *later* HTN status at 10y-follow-up. Also, (iv) the relationship between blood pressure  
472 and mental health – at the initial exam – was moderated by later HTN, such that the negative association  
473 between blood pressure and depressive symptoms was stronger in those participants who later  
474 developed HTN. Finally, (v) our results from task-based functional brain imaging provide further  
475 support for an impact of blood pressure and HTN on central processing of emotions: We demonstrate a  
476 negative relationship between SBP - at baseline (~10 years prior to fMRI) and at the time point of  
477 imaging - and the BOLD fMRI response to aversive emotional stimuli. This relationship was again  
478 moderated by HTN status at follow-up, such that people who developed HTN showed overall lower  
479 responses to aversive stimuli and a flattened (negative) relationship between SBP and brain responses.  
480 Taken together, our results support the notion that the interrelation between blood pressure and mental  
481 health may be involved in the development of high blood pressure with potential implications for  
482 developing new preventive and therapeutic approaches for essential hypertension.

483 We preregistered and confirmed a conceptual replication that higher SBP related to better mood  
484 ratings: Our findings are consistent with studies reporting positive effects of elevated blood pressure on  
485 mental health, including decreased depressive symptoms<sup>16-18</sup>, better quality of life<sup>12,18</sup>, and reduced  
486 self-reported stress<sup>13-15</sup>. We extend these findings, which were based on either cross-sectional designs  
487 or shorter follow-up periods (1-5 years), by demonstrating that baseline SBP remained a significant

488 predictor of mental health up to 10 years later. The positive effects of high blood pressure on mood  
489 might be related to research findings showing that higher blood pressure diminishes emotional  
490 experience in experimental manipulations<sup>43-45</sup>. It is also well established that elevated blood pressure  
491 robustly reduces the perception of physical pain<sup>21,25,46,47</sup>, but also social pain<sup>48</sup>. It has therefore been  
492 hypothesised that elevated blood pressure relates to a generalised attenuation of emotional valence  
493 processing<sup>25,45</sup>. Our fMRI findings are consistent with this notion, suggesting an impact of blood  
494 pressure on the processing of (negative) emotional faces, even at a follow-up after 10 years. Importantly,  
495 while affective attenuation might relate to coping mechanisms to ‘lift mood’ in stressful situations, it  
496 could reinforce staying in potentially harmful circumstances over prolonged periods of time. This may  
497 lead to further blood pressure increases and eventually to HTN (see below)<sup>20,25,27-29</sup>.

498 Given these consistent findings of a positive association between blood pressure and mood, it seems  
499 paradoxical that we found a different pattern for diagnosed HTN; albeit again in line with previous  
500 studies in which the presence of vascular risk factors or manifest CVD has been associated with  
501 increased depressive symptoms<sup>49,50</sup> and decreased well-being<sup>51</sup>. Several potential explanations have  
502 been put forward: Biological explanations build on well-known pathophysiological consequences of  
503 chronic blood pressure elevations (e.g., atherosclerosis, small vessel disease, etc.) leading to ischaemic  
504 brain damage indicated by white matter lesions, microinfarcts, and cerebral micro-haemorrhages<sup>52</sup>.  
505 White matter lesions, in particular, have been linked to the occurrence of depression with a vascular  
506 component<sup>53,54</sup>. Systemic mechanisms resulting from unfavourable metabolic alterations, which are  
507 common in people with HTN, and an unhealthy lifestyle (e.g. smoking, physical inactivity, unbalanced  
508 diet, etc.) have also been linked to depression via metabolic, immuno-inflammatory and autonomic  
509 pathways (reviewed in<sup>55</sup>). Psychological explanations, on the other hand, emphasise that individuals  
510 receiving a diagnosis of HTN are often confronted with a sudden awareness of a chronic illness that  
511 requires medical attention and change of lifestyle. The negative psychological consequences of such a  
512 ‘labelling’ effect could underlie opposing effects of elevated blood pressure and HTN diagnosis on  
513 mental health<sup>56,57</sup>.



514 Based on our data, we cannot exclude contributions of the factors discussed above, however, a major  
515 new finding of our study (i.e., that an impact of HTN on mood is already present before the diagnosis),  
516 is difficult to reconcile with these explanations: While in our analysis, we observed – as expected – that,  
517 at the initial visit, those participants who later developed HTN already had higher blood pressure than  
518 those who stayed normotensive;; in the fully adjusted model, i.e., correcting for the differences in blood  
519 pressure, the negative impact of (later) HTN on mental health was already significantly present *before*  
520 the HTN diagnosis. We found this in two analyses, one in which HTN was defined by previous HTN  
521 diagnosis and intake of medication, and one in which SBP>140 mmHg was also used as criterion. In  
522 both analyses – when unadjusted for blood pressure – there were no significant differences in mental  
523 health at either visit while the difference was highly significant when adjusted for blood pressure.  
524 Interestingly, we also noted in both analyses that the two groups differed regarding the overall ‘mood-  
525 lifting effect’ of higher blood pressure at the initial visit, such that this effect was more pronounced in  
526 the group of those participants who developed HTN later. Thus, it seems that in the HTN-developing  
527 group, the relationship between blood pressure and mental health was both shifted in magnitude and  
528 had a different slope. This finding cannot be explained by the ‘labelling’ effect and is also unlikely to  
529 be related to vascular damage, such as white matter lesions, as these occur only after long-lasting blood  
530 pressure elevations.

531 Obvious candidates for explaining effects of blood pressure on mental health are regulatory circuits  
532 linking arterial blood pressure to central processing in the brain. While the causal, and likely  
533 multifactorial, pathways between blood pressure and mental health are not fully understood, a shared  
534 mechanism between subjective experience, emotional processing and pain involves the regulatory  
535 baroreflex system. Baroreceptors, stretch sensitive receptors located in the aortic arch and the carotid  
536 artery sinus, are the peripheral sensors of blood pressure<sup>58–60</sup>. During each heartbeat, baroreceptors are  
537 activated during systole and become less active during diastole. They are known to relay phasic and  
538 tonic information about blood pressure via the vagal and glossopharyngeal nerves to brain stem nuclei  
539 which orchestrate adjustments of blood pressure and heart frequency via the parasympathetic and  
540 sympathetic nervous system<sup>58–60</sup>. Importantly, in addition to their role in adjusting blood pressure and

541 heart frequency, baroreceptor activation has also been shown to influence emotional and pain  
542 processing (reviewed by Suarez-Roca et al., 2021), thereby mediating behavioural and central effects  
543 of blood pressure modulations. Direct evidence comes from animal studies, in which for example, pain-  
544 relieving effects of blood pressure elevations were abolished by baroreceptor denervation<sup>20,27</sup> and from  
545 studies in humans in whom local baroreceptor stimulation modulated pain perception<sup>21,24,25,27</sup>. Further  
546 evidence has been provided by numerous studies showing different processing of pain, emotion, and  
547 sensory stimuli in systole versus diastole<sup>22,23,26,61</sup>. Importantly, it is also well established that the  
548 development of HTN is characterised by a progressive desensitisation of baroreceptors and altered  
549 sensory processing<sup>27,62</sup>. It, therefore, seems highly plausible that (relatively reduced) baroreceptor  
550 signalling might also underlie the observed altered relationship between blood pressure and mental  
551 health in hypertensive people. Our results furthermore indicate that the altered relationship between  
552 blood pressure and mental health may already be present years before the diagnosis of HTN. In a similar  
553 vein, our fMRI findings show an altered relationship between blood pressure and BOLD activation to  
554 negative facial expressions in people with HTN, consistent with adjusting central processing of  
555 emotions as a response to baroreceptor desensitisation. In sum, there is evidence that baroreceptor  
556 signalling can underlie the effect of higher blood pressure on mental health.

557 With regard to the development of blood pressure increases over the life course and eventually the  
558 pathophysiology of arterial HTN, our findings are consistent with the notion of feedback loops wherein  
559 arousing emotional stimuli and stressors elevate blood pressure, which in turn activates baroreceptor  
560 pathways that induce analgesia and decrease the perceived affective magnitude of a stressor<sup>29</sup>. While  
561 psychosocial stress is increasingly accepted as a risk factor for the development of hypertension<sup>63</sup>,  
562 blood pressure adjustments – via baroreceptor signalling - may link stress to a rewarding mechanism  
563 decreasing perceived stress. Reinforcement by repeated stress exposure may eventually lead (or  
564 contribute) to increases in blood pressure and the development of essential HTN<sup>20,25,27-29</sup>. Our data  
565 further emphasise inter-individual differences: Those individuals who later developed HTN on average  
566 showed lower mental health scores when adjusting for SBP. In addition, our moderation analysis  
567 yielded that the development of HTN was associated with a stronger negative correlation between

568 mental health and blood pressure at baseline, years before the HTN diagnosis. While the observed *inter-*  
569 individual differences cannot be readily interpreted as indicative of *intra*-individual mechanisms, it is  
570 nevertheless tempting to speculate that people at higher risk of developing HTN require higher blood  
571 pressure levels to sustain the same mental health outcomes. These individuals may find themselves on  
572 a relatively steeper trajectory towards HTN due to the stronger ‘mood-lifting effect’ of blood pressure  
573 increases. Taken together we propose that (i) feedback loops between blood pressure and rewarding  
574 emotional processing during periods of stress may play a role in the pathophysiology of blood pressure  
575 increases and HTN and that (ii) alterations of these feedback loops characterised by a shifted blood  
576 pressure - mental health relationship may increase HTN risk in affected individuals. Based on our data,  
577 we cannot differentiate between potential reasons for the altered blood pressure-mental health  
578 relationship in the mostly middle-aged participants, which may include genetics, life-style factors, such  
579 as nutrition or the environment, previous exposure to acute and chronic stress or other factors. Clearly,  
580 there is a need for prospective longitudinal studies clarifying this issue.

581 Beyond effects of blood pressure and diagnosed HTN, other factors such as medication and previous  
582 diseases can influence mental health and thus be confounders in our analyses. For example, Hermann-  
583 Lingen et al.<sup>18</sup> reported lower physical well-being in participants on antihypertensive medication. Boal  
584 et al.<sup>64</sup> reported differential effects of antihypertensive medication on risk of hospital admissions for  
585 mood disorders. Additionally, intake of antidepressant drugs has been previously related to elevated  
586 blood pressure<sup>16</sup>. To account for these potentially confounding factors, we investigated effects of the  
587 presence or absence of a lifetime major depression diagnosis, other forms of chronic illness as well as  
588 intake of (antihypertensive) medications in sensitivity analyses. Importantly, the findings of our study  
589 were robust and consistent: Independent of any potential confounders including medication intake, there  
590 was a ‘mood-lifting’ effect of higher SBP on depressive symptoms and well-being, as well as a negative  
591 effect of HTN diagnosis on mood.

592 The results reported here are contingent on several limitations. We used UK Biobank data which is not  
593 representative of the middle-aged and older UK population<sup>65</sup>. The sample, particularly the  
594 neuroimaging sub-sample, displays the ‘healthy volunteer’ effect, which describes that UK Biobank

595 participants are considered to be more health-conscious, self-reported fewer health conditions and show  
596 lower rates of all-cause mortality and total cancer incidence compared to the general population<sup>65</sup>. Yet,  
597 associations between risk factors and disease outcomes in UK Biobank have been reported to be  
598 generalisable despite the ‘healthy volunteer’ effect<sup>65,66</sup>.

599 Similar to previous studies, we used self-reports of HTN and antihypertensive medications. Self-  
600 reported HTN can underestimate the true underlying prevalence<sup>67</sup> and may influence subjective health  
601 itself<sup>57</sup>. In addition, participants' self-reports of prescribed antihypertensive medications might  
602 overestimate the actual number of medications taken due to poor adherence<sup>68</sup>. In addition to self-report  
603 measures, we included direct standardised blood pressure recordings, as well as Likert-scale measures  
604 of depressive symptoms and well-being, which enabled us to parametrically model these exposures and  
605 outcomes in linear regression models. The mental health assessments were, however, not designed for  
606 psychiatric diagnostics, which leaves the question open whether the observed effects manifest in the  
607 sub-clinical and/or clinical range of psychiatric symptoms.

608 A recent study also showed that averaging blood pressure values from the first and second reading, as  
609 we did here, might underestimate the true prevalence of HTN<sup>69</sup>. While we have not used the blood  
610 pressure readings to define HTN in our study, we acknowledge that the procedure of blood pressure  
611 readings may have an undetected effect on our results. Yet, our results converge also when using HTN  
612 diagnosis from self-reports and hospital records, which strengthens the overall confidence in the  
613 robustness of our findings.

614 Conceptually, one may question the strict dichotomy between HTN versus no HTN, particularly as  
615 blood pressure thresholds for HTN diagnosis have shifted towards lower values in the last decades.  
616 However, given the diagnostic criteria for HTN at the time of the study, we assume them to be followed  
617 by most physicians in clinical care. Thus, we consider the self-reported HTN status to be a reasonable  
618 definition with predictive value for clinical outcomes in an epidemiological study<sup>68</sup>.

619 Based on our preregistered hypotheses, we only tested linear associations between blood pressure and  
620 mental health. While Montano<sup>16</sup> showed that non-linear models testing cross-sectional blood pressure-

621 mood associations do not outperform linear models, longitudinal trajectories of both blood pressure,  
622 mental health and their interaction over the lifespan are plausible and may reveal diverging patterns.  
623 Furthermore, observed effect sizes were small and currently clearly no conclusion can be made from  
624 our data on individual patient care. Given the known effects of blood pressure on emotional processing,  
625 we speculate that – despite the small inter-individual effect sizes in our study – more pronounced intra-  
626 individual effects might exist. Our study may stimulate future work testing the hypothesis that blood  
627 pressure variations and associated mental health need to be taken into account, also in the individual  
628 management of people at risk for HTN. Considering the high prevalence of HTN and its treatment in  
629 the general population, as well as rising numbers of sub-clinically elevated blood pressure, small effect  
630 sizes may be epidemiologically relevant.

631 Our fMRI findings may be confounded by alterations in neurovascular coupling with HTN <sup>70</sup>. While  
632 this should be largely accounted for by reporting the BOLD activation *contrast* between two different  
633 types of stimuli (emotional faces versus shapes), we cannot exclude a remaining impact of impaired  
634 neurovascular coupling. Since the Hariri-task was limited to faces with negative emotions, future  
635 studies may add information about the impact of blood pressure on neural processing of positive  
636 emotions.

637 Importantly, our results are not ideal to draw firm conclusions about causality and directionality of the  
638 associations between blood pressure, HTN and mental health, with particularly the differentiation  
639 between effects of blood pressure *per se* and HTN remaining complex. Future longitudinal studies  
640 should therefore include earlier baseline assessments, repeated and/or continuous blood pressure  
641 monitoring over long time periods combined with frequent assessments of mental health and  
642 neuroimaging. Finally, randomised controlled trials targeted at assessing the bi-directional relationships  
643 of blood pressure and mental health will provide strong designs to elucidate these effects.

644  
645 In summary, in a large British population sample of generally healthy middle-aged and older  
646 individuals, we found a relationship of elevated blood pressure with fewer depressive symptoms and  
647 greater well-being extending to a follow-up period up to around 10 years. We found the opposite effect

648 for diagnosed HTN – already years before the timepoint of diagnosis. Participants who were  
649 normotensive at baseline and later developed HTN showed alterations in the blood pressure-mental  
650 health relationship already at baseline. An additional novelty of our study lies in the use of fMRI  
651 analyses, which suggested an impact of blood pressure levels and HTN development on the neural  
652 processing of emotional stimuli. The results were overall robust to bias of medications, chronic illness,  
653 survival, social factors and unmeasured confounds. While the observed effects are small and results  
654 from this observational study may not be directly applicable to clinical outcomes, our study provides a  
655 novel perspective on how the interrelation of sub-clinical mental health and blood pressure might be  
656 involved in blood pressure increases during ageing and development of HTN that could have  
657 implications for developing new preventive and therapeutic approaches.

658 **Data Availability**

659 All data used in this study is available through the public resource of the UK Biobank  
660 (<http://www.ukbiobank.ac.uk/>). The authors' access to the UK Biobank Resource was granted under  
661 Application Number 37721.

662

663

664 **Code Availability**

665 To allow for replication studies and reproducibility of our results, the analysis code can be found in the  
666 Open Science Framework repository of this study (<https://osf.io/638jg>).

667 **References**

- 668 1. Cohen, B. E., Edmondson, D. & Kronish, I. M. State of the art review: Depression, stress,  
669 anxiety, and cardiovascular disease. *American Journal of Hypertension* vol. 28 1295–1302 Preprint at  
670 <https://doi.org/10.1093/ajh/hpv047> (2015).
- 671 2. Forouzanfar, M. H. *et al.* Global Burden of Hypertension and Systolic Blood Pressure of at  
672 Least 110 to 115 mm Hg, 1990-2015. *JAMA* **317**, 827–838 (2017).
- 673 3. Moise, N. *et al.* Elucidating the Association Between Depressive Symptoms, Coronary Heart  
674 Disease, and Stroke in Black and White Adults: The REasons for Geographic And Racial Differences  
675 in Stroke (REGARDS) Study. *Journal of the American Heart Association* **5**, 7–9 (2016).
- 676 4. Correll, C. U. *et al.* Prevalence, incidence and mortality from cardiovascular disease in patients  
677 with pooled and specific severe mental illness: a large-scale meta-analysis of 3,211,768 patients and  
678 113,383,368 controls. *World Psychiatry* **16**, 163–180 (2017).
- 679 5. Hamer, M., Batty, G. D., Stamatakis, E. & Kivimaki, M. The combined influence of  
680 hypertension and common mental disorder on all-cause and cardiovascular disease mortality. *Journal*  
681 *of Hypertension* **28**, 2401–2406 (2010).
- 682 6. Byrd, J. B. & Brook, R. D. Anxiety in the “Age of Hypertension”. *Current Hypertension*  
683 *Reports* vol. 16 486 Preprint at <https://doi.org/10.1007/s11906-014-0486-0> (2014).
- 684 7. Meng, L., Chen, D., Yang, Y., Zheng, Y. & Hui, R. Depression increases the risk of  
685 hypertension incidence: A meta-analysis of prospective cohort studies. *Journal of Hypertension* vol. 30  
686 842–851 Preprint at <https://doi.org/10.1097/HJH.0b013e32835080b7> (2012).
- 687 8. Nabi, H. *et al.* Trajectories of Depressive Episodes and Hypertension Over 24 Years.  
688 *Hypertension* **57**, 710–716 (2011).
- 689 9. Nicholson, A., Kuper, H. & Hemingway, H. Depression as an aetiologic and prognostic factor  
690 in coronary heart disease: A meta-analysis of 6362 events among 146 538 participants in 54  
691 observational studies. *European Heart Journal* **27**, 2763–2774 (2006).
- 692 10. Shah, M. T., Zonderman, A. B. & Waldstein, S. R. Sex and age differences in the relation of  
693 depressive symptoms with blood pressure. *American Journal of Hypertension* **26**, 1413–1420 (2013).
- 694 11. Taylor, W. D., Aizenstein, H. J. & Alexopoulos, G. S. The vascular depression hypothesis:  
695 Mechanisms linking vascular disease with depression. *Molecular Psychiatry* **18**, 963–974 (2013).
- 696 12. Berendes, A., Meyer, T., Hulpke-Wette, M. & Herrmann-Lingen, C. Association of elevated  
697 blood pressure with low distress and good quality of life: results from the nationwide representative



- 698 German Health Interview and Examination. *Psychosomatic Medicine* **75**, 422–428 (2013).
- 699 13. Winkleby, M. A., Ragland, D. R. & Syme, S. L. Self-Reported Stressors and Hypertension:  
700 Evidence of an Inverse Association. *American Journal of Epidemiology* **127**, 124–134 (1988).
- 701 14. Hassoun, L. *et al.* Association between chronic stress and blood pressure: findings from the  
702 German Health Interview and Examination Survey for Adults 2008–2011. *Psychosomatic medicine* **77**,  
703 575–82 (2015).
- 704 15. Nyklíček, I., Vingerhoets, A. J. J. M. & Van Heck, G. L. Hypertension and appraisal of physical  
705 and psychological stressors. *Journal of Psychosomatic Research* (2001) doi:10.1016/S0022-  
706 3999(01)00194-5.
- 707 16. Montano, D. Depressive Symptoms and Blood Pressure: A Cross-Sectional Study of Population  
708 Data. *Journal of Psychophysiology* (2019) doi:10.1027/0269-8803/a000242.
- 709 17. Patel, J. S., Berntson, J., Polanka, B. M. & Stewart, J. C. Cardiovascular Risk Factors as  
710 Differential Predictors of Incident Atypical and Typical Major Depressive Disorder in US Adults.  
711 *Psychosomatic Medicine* **80**, 508–514 (2018).
- 712 18. Herrmann-Lingen, C. *et al.* Cross-Sectional and Longitudinal Associations of Systolic Blood  
713 Pressure With Quality of Life and Depressive Mood in Older Adults With Cardiovascular Risk Factors.  
714 *Psychosomatic Medicine* **80**, 468–474 (2018).
- 715 19. Reyes Del Paso, G. A., Garrido, S., Pulgar, Á., Martín-Vázquez, M. & Duschek, S. Aberrances  
716 in autonomic cardiovascular regulation in fibromyalgia syndrome and their relevance for clinical pain  
717 reports. *Psychosomatic Medicine* **72**, 462–470 (2010).
- 718 20. Dworkin, B. R., Filewich, R. J., Miller, N. E., Craigmyle, N. & Pickering, T. G. Baroreceptor  
719 activation reduces reactivity to noxious stimulation: implications for hypertension. *Science (New York,*  
720 *N.Y.)* **205**, 1299–301 (1979).
- 721 21. Dworkin, B. R. *et al.* Central effects of baroreceptor activation in humans: attenuation of  
722 skeletal reflexes and pain perception. *Proceedings of the National Academy of Sciences* **91**, 6329–6333  
723 (1994).
- 724 22. Al, E. *et al.* Heart–brain interactions shape somatosensory perception and evoked potentials.  
725 *Proceedings of the National Academy of Sciences* 201915629 (2020) doi:10.1073/pnas.1915629117.
- 726 23. Garfinkel, S. N. & Critchley, H. D. Threat and the Body: How the Heart Supports Fear  
727 Processing. *Trends in Cognitive Sciences* **20**, 34–46 (2016).

- 728 24. Mini, A., Rau, H., Montoya, P., Palomba, D. & Birbaumer, N. Baroreceptor cortical effects,  
729 emotions and pain. *International journal of psychophysiology* **19**, 67–77 (1995).
- 730 25. Rau, H. & Elbert, T. Psychophysiology of arterial baroreceptors and the etiology of  
731 hypertension. *Biological Psychology* **57**, 179–201 (2001).
- 732 26. Gray, M. a, Minati, L., Paoletti, G. & Critchley, H. D. Baroreceptor activation attenuates  
733 attentional effects on pain-evoked potentials. *Pain* **151**, 853–61 (2010).
- 734 27. Ghione, S. Hypertension-Associated Hypalgesia. *Hypertension* **28**, 494–504 (1996).
- 735 28. Herrmann-Lingen, C. & Al’Absi, M. Exploring the Association of Hypertension with Risk for  
736 Depression. *Psychosomatic Medicine* **1** (2018) doi:10.1097/PSY.0000000000000611.
- 737 29. Petzschner, F. H., Garfinkel, S. N., Paulus, M. P., Koch, C. & Khalsa, S. S. Computational  
738 Models of Interoception and Body Regulation. *Trends in Neurosciences* **44**, 63–76 (2021).
- 739 30. Sudlow, C. *et al.* UK Biobank: An Open Access Resource for Identifying the Causes of a Wide  
740 Range of Complex Diseases of Middle and Old Age. *PLoS Medicine* **12**, 1–10 (2015).
- 741 31. Hariri, A. R., Tessitore, A., Mattay, V. S., Fera, F. & Weinberger, D. R. The Amygdala  
742 Response to Emotional Stimuli: A Comparison of Faces and Scenes. *NeuroImage* **17**, 317–323 (2002).
- 743 32. Barch, D. M. *et al.* Function in the human connectome: Task-fMRI and individual differences  
744 in behavior. *NeuroImage* **80**, 169–189 (2013).
- 745 33. Miller, K. L. *et al.* Multimodal population brain imaging in the UK Biobank prospective  
746 epidemiological study. *Nature Neuroscience* **19**, 1523–1536 (2016).
- 747 34. Alfaro-Almagro, F. *et al.* Image processing and Quality Control for the first 10,000 brain  
748 imaging datasets from UK Biobank. *NeuroImage* **166**, 400–424 (2018).
- 749 35. Davis, K. A. S. *et al.* Mental health in UK Biobank – development, implementation and results  
750 from an online questionnaire completed by 157 366 participants: a reanalysis. *BJPsych Open* **6**, (2020).
- 751 36. Dutt, R. K. *et al.* Mental health in the UK Biobank: A roadmap to self-report measures and  
752 neuroimaging correlates. *Human Brain Mapping* **43**, 816–832 (2022).
- 753 37. Lyall, L. M. *et al.* Association of disrupted circadian rhythmicity with mood disorders,  
754 subjective wellbeing, and cognitive function: a cross-sectional study of 91 105 participants from the  
755 UK Biobank. *The Lancet Psychiatry* **5**, 507–514 (2018).
- 756 38. Kroenke, K., Spitzer, R. L. & Williams, J. B. W. The PHQ-9. *Journal of General Internal*

- 757 *Medicine* **16**, 606–613 (2001).
- 758 39. Kwong, K. K. *et al.* Dynamic magnetic resonance imaging of human brain activity during  
759 primary sensory stimulation. *Proceedings of the National Academy of Sciences* **89**, 5675–5679 (1992).
- 760 40. Logothetis, N. K. What we can do and what we cannot do with fMRI. *Nature* **453**, 869–878  
761 (2008).
- 762 41. Ogawa, S. *et al.* Intrinsic signal changes accompanying sensory stimulation: functional brain  
763 mapping with magnetic resonance imaging. *Proceedings of the National Academy of Sciences* **89**,  
764 5951–5955 (1992).
- 765 42. Jaccard, J., Turrisi, R. & Jaccard, J. *Interaction Effects in Multiple Regression*. (SAGE, 2003).
- 766 43. McCubbin, J. A. *et al.* Cardiovascular-Emotional Dampening. *Psychosomatic Medicine* **73**,  
767 743–750 (2011).
- 768 44. Pury, C. L. S., McCubbin, J. A., Helfer, S. G., Galloway, C. & McMullen, L. J. Elevated resting  
769 blood pressure and dampened emotional response. *Psychosomatic medicine* **66**, 583–7 (2004).
- 770 45. McCubbin, J. A. *et al.* Emotional Dampening in Persons with Elevated Blood Pressure: Affect  
771 Dysregulation and Risk for Hypertension. *Annals of Behavioral Medicine* **47**, 111–119 (2014).
- 772 46. Ghione, S., Rosa, C., Mezzasalma, L. & Panattoni, E. Arterial hypertension is associated with  
773 hypalgesia in humans. *Hypertension* **12**, 491–497 (1988).
- 774 47. Bruehl, S., Carlson, C. R. & McCubbin, J. A. The relationship between pain sensitivity and  
775 blood pressure in normotensives. *Pain* (1992) doi:10.1016/0304-3959(92)90099-W.
- 776 48. Inagaki, T. K., Jennings, J. R., Eisenberger, N. I. & Gianaros, P. J. Taking rejection to heart:  
777 Associations between blood pressure and sensitivity to social pain. *Biological Psychology* **139**, 87–95  
778 (2018).
- 779 49. Blöchl, M. & Nestler, S. Long-term Changes in Depressive Symptoms Before and After Stroke.  
780 *Neurology* (2022) doi:10.1212/WNL.0000000000200756.
- 781 50. Kivimäki, M. *et al.* Vascular Risk Status as a Predictor of Later-Life Depressive Symptoms: A  
782 Cohort Study. *Biological Psychiatry* **72**, 324–330 (2012).
- 783 51. Wikman, A., Wardle, J. & Steptoe, A. Quality of Life and Affective Well-Being in Middle-  
784 Aged and Older People with Chronic Medical Illnesses: A Cross-Sectional Population Based Study.  
785 *PLoS ONE* **6**, e18952 (2011).

- 786 52. Gorelick, P. B. *et al.* Vascular contributions to cognitive impairment and dementia: A statement  
787 for healthcare professionals from the American Heart Association/American Stroke Association. *Stroke*  
788 **42**, 2672–2713 (2011).
- 789 53. Godin, O. *et al.* White Matter Lesions as a Predictor of Depression in the Elderly: The 3C-  
790 Dijon Study. *Biological Psychiatry* **63**, 663–669 (2008).
- 791 54. Tully, P. J., Debette, S., Mazoyer, B. & Tzourio, C. White Matter Lesions are Associated with  
792 Specific Depressive Symptom Trajectories among Incident Depression and Dementia Populations:  
793 Three-City Dijon MRI Study. *American Journal of Geriatric Psychiatry* **25**, 1311–1321 (2017).
- 794 55. Penninx, B. W. J. H. Depression and cardiovascular disease: Epidemiological evidence on their  
795 linking mechanisms. *Neuroscience and Biobehavioral Reviews* **74**, 277–286 (2017).
- 796 56. Tikhonoff, V. *et al.* The relationship between affective symptoms and hypertension—role of  
797 the labelling effect: the 1946 British birth cohort. *Open Heart* **3**, e000341 (2016).
- 798 57. Pickering, T. G. Now We Are Sick: Labeling and Hypertension. *The Journal of Clinical*  
799 *Hypertension* **8**, 57–60 (2006).
- 800 58. Critchley, H. D. & Harrison, N. a. Visceral influences on brain and behavior. *Neuron* **77**, 624–  
801 38 (2013).
- 802 59. Dampney, R. A. L. Central neural control of the cardiovascular system: current perspectives.  
803 *Advances in Physiology Education* **40**, (2016).
- 804 60. Suarez-Roca, H., Mamoun, N., Sigurdson, M. I. & Maixner, W. Baroreceptor modulation of  
805 the cardiovascular system, pain, consciousness, and cognition. *Comprehensive Physiology* **11**, 1373–  
806 1423 (2021).
- 807 61. Wilkinson, M., McIntyre, D. & Edwards, L. Electrocutaneous pain thresholds are higher during  
808 systole than diastole. *Biological Psychology* **94**, 71–73 (2013).
- 809 62. Zamir, N. & Shuber, E. *Altered pain perception in hypertensive humans. Brain Research* vol.  
810 201 (1980).
- 811 63. Cuffee, Y., Ogedegbe, C., Williams, N. J., Ogedegbe, G. & Schoenthaler, A. Psychosocial Risk  
812 Factors for Hypertension: an Update of the Literature. *Current Hypertension Reports* vol. 16 Preprint  
813 at <https://doi.org/10.1007/s11906-014-0483-3> (2014).
- 814 64. Boal, A. H. *et al.* Monotherapy with major antihypertensive drug classes and risk of hospital  
815 admissions for mood disorders. *Hypertension* **68**, 1132–1138 (2016).

- 816 65. Fry, A. *et al.* Comparison of Sociodemographic and Health-Related Characteristics of UK  
817 Biobank Participants With Those of the General Population. *American Journal of Epidemiology* **186**,  
818 1026–1034 (2017).
- 819 66. Batty, G. D., Gale, C. R., Kivimäki, M., Deary, I. J. & Bell, S. Comparison of risk factor  
820 associations in UK Biobank against representative, general population based studies with conventional  
821 response rates: prospective cohort study and individual participant meta-analysis. *BMJ* **368**, m131  
822 (2020).
- 823 67. Gonçalves, V. S. S. *et al.* Accuracy of self-reported hypertension. *Journal of Hypertension* **36**,  
824 970–978 (2018).
- 825 68. Stirratt, M. J. *et al.* Self-report measures of medication adherence behavior: recommendations  
826 on optimal use. *Translational Behavioral Medicine* **5**, 470–482 (2015).
- 827 69. Carrillo-Larco, R. M., Guzman-Vilca, W. C. & Neupane, D. Simplified hypertension screening  
828 methods across 60 countries: An observational study. *PLOS Medicine* **19**, e1003975 (2022).
- 829 70. Iadecola, C. & Gottesman, R. F. Neurovascular and Cognitive Dysfunction in Hypertension:  
830 Epidemiology, Pathobiology, and Treatment. *Circulation Research* **124**, 1025–1044 (2019).

831 **Acknowledgements**

832 This research has been conducted using the UK Biobank Resource under Application Number 37721.

833 We would like to sincerely thank all participants and staff who made it possible that this rich resource  
834 is available to the scientific community.

835

836 **Author contributions**

837 L.S., M.B., D.K., M.U. and A.V. conceptualized the study. L.S., M.B., D.K., M.U. and A.V. designed  
838 and developed the methodologies. L.S. analysed, visualised, and curated the data, as well as managed  
839 the research project. L.L. curated the medication data. L.S. and A.V. wrote the initial draft of the  
840 manuscript. A.V. and S.L.V. supervised the research. All authors critically reviewed and edited the  
841 manuscript and contributed to the final version of the paper.

842

843 **Competing interests**

844 The authors declare no competing interests.

845
